# Supplementary material for: A Participatory Approach in Assessing the Knowledge, Attitude, and Practices (KAP) of Stakeholders and Livestock Owners about Ticks and Tick-Borne Diseases from Sindh, Pakistan
Source: MDPI journal article supplement (doi:10.3390/pathogens12060800), 2023-06-03
Supplement: s1 [file s1]

## S1 Questionnaire

**Title: A Participatory Approach in Assessing the Knowledge, Attitude and Practices (KAP) of Stakeholders and Livestock Owners about Ticks and Tick-Borne Diseases from Sindh, Pakistan**

### Section 1.1: Sociodemographic information of Participant's

|       |                      |                                                                                                                                                                                                                                                                                                                   |
|-------|----------------------|-------------------------------------------------------------------------------------------------------------------------------------------------------------------------------------------------------------------------------------------------------------------------------------------------------------------|
| 1.1.1 | Name:                |                                                                                                                                                                                                                                                                                                                   |
| 1.1.2 | Age (Years):         |                                                                                                                                                                                                                                                                                                                   |
| 1.1.3 | Gender:              | 1 <input type="checkbox"/> Male<br>2 <input type="checkbox"/> Female                                                                                                                                                                                                                                              |
| 1.1.4 | Level of education:  | 1 <input type="checkbox"/> No school attended<br>2 <input type="checkbox"/> Received non-formal education<br>3 <input type="checkbox"/> Completed Primary school education<br>4 <input type="checkbox"/> High level school<br>5 <input type="checkbox"/> Secondary level<br>6 <input type="checkbox"/> Graduation |
| 1.1.5 | Profession or status | 1. <input type="checkbox"/> Community member<br>2. <input type="checkbox"/> Veterinarian<br>3. <input type="checkbox"/> Livestock owner                                                                                                                                                                           |

## Section 1.2: Animal husbandry and Managerial strategy

|       |                                                 |                                                                                                                                                      |
|-------|-------------------------------------------------|------------------------------------------------------------------------------------------------------------------------------------------------------|
| 1.2.2 | Animal feeding practice at your livestock farm? | 1 <input type="checkbox"/> Stall feeding<br>2 <input type="checkbox"/> All-time free grazing<br>3 <input type="checkbox"/> Mixture of all the above  |
| 1.2.2 | Animal catchment area?                          | 1 <input type="checkbox"/> Forested<br>2 <input type="checkbox"/> Urban<br>3 <input type="checkbox"/> Rural<br>4 <input type="checkbox"/> Semi-Urban |

## Section 2.1: Awareness and knowledge of TTBDs in livestock

|       |                                                                   |                                                                                                                                                                                                                       |
|-------|-------------------------------------------------------------------|-----------------------------------------------------------------------------------------------------------------------------------------------------------------------------------------------------------------------|
| 2.1.1 | Have you ever encountered a tick?                                 | 1 <input type="checkbox"/> No<br>2 <input type="checkbox"/> Yes                                                                                                                                                       |
| 2.1.2 | If you have encountered a tick, where do you typically find them? | 1 <input type="checkbox"/> Forest<br>2 <input type="checkbox"/> Animals body<br>3 <input type="checkbox"/> Pasture land<br>4 <input type="checkbox"/> Agriculture land<br>5 <input type="checkbox"/> All of the above |
| 2.1.3 | In which areas do you believe ticks are mostly found?             | 1 <input type="checkbox"/> Warm places<br>2 <input type="checkbox"/> Cold places<br>3 <input type="checkbox"/> Both the places                                                                                        |
| 2.1.4 | During which season ticks are mostly found on livestock?          | 1 <input type="checkbox"/> Winter<br>2 <input type="checkbox"/> Summer<br>3 <input type="checkbox"/> Throughout the year                                                                                              |

|       |                                                                                        |                                                                                                                                                                                                                                                                                                                                   |
|-------|----------------------------------------------------------------------------------------|-----------------------------------------------------------------------------------------------------------------------------------------------------------------------------------------------------------------------------------------------------------------------------------------------------------------------------------|
| 2.1.5 | From where do you believe animals acquire ticks?                                       | 1 <input type="checkbox"/> Grazing land<br>2 <input type="checkbox"/> Bedding materials<br>3 <input type="checkbox"/> Forest<br>4 <input type="checkbox"/> Agriculture land<br>5 <input type="checkbox"/> No idea                                                                                                                 |
| 2.1.6 | Which types of livestock breeds do you think are most susceptible to tick infestation? | 1 <input type="checkbox"/> Indigenous breeds<br>2 <input type="checkbox"/> Non- Native breeds<br>3 <input type="checkbox"/> No idea                                                                                                                                                                                               |
| 2.1.7 | In your opinion which animal breed mostly affected with TTBDs?                         | 1 <input type="checkbox"/> Females<br>2 <input type="checkbox"/> Old animals<br>3 <input type="checkbox"/> Young animals<br>4 <input type="checkbox"/> Adults                                                                                                                                                                     |
| 2.1.8 | Most commonly tick infestation site on animal body is?                                 | 1 <input type="checkbox"/> Neck region<br>2 <input type="checkbox"/> Chest and axillae<br>3 <input type="checkbox"/> Groin and udder<br>4 <input type="checkbox"/> Head region<br>6 <input type="checkbox"/> Dewlap<br>7 <input type="checkbox"/> Anus and perianal region<br>8 <input type="checkbox"/> Others (belly and limbs) |
| 2.1.9 | Tick infestation remains always unless it removed?                                     | 1 <input type="checkbox"/> No<br>2 <input type="checkbox"/> Yes<br>3 <input type="checkbox"/> Don't know                                                                                                                                                                                                                          |
|       |                                                                                        |                                                                                                                                                                                                                                                                                                                                   |

|        |                                                                                                                        |                                                                                                                                                                                                                                                                                                                                                                                                                                                                                                                                       |
|--------|------------------------------------------------------------------------------------------------------------------------|---------------------------------------------------------------------------------------------------------------------------------------------------------------------------------------------------------------------------------------------------------------------------------------------------------------------------------------------------------------------------------------------------------------------------------------------------------------------------------------------------------------------------------------|
| 2.1.12 | What are the most devastating effects of ticks on health and production of an animal?<br>You can choose more options . | 1 <input type="checkbox"/> Bloodsucking<br>2 <input type="checkbox"/> Bite wound<br>3 <input type="checkbox"/> Anorexia<br>4 <input type="checkbox"/> Loss of weight<br>5 <input type="checkbox"/> Babesiosis<br>6 <input type="checkbox"/> Anaplasmosis<br>7 <input type="checkbox"/> Theileriosis<br>8 <input type="checkbox"/> Fever<br>9 <input type="checkbox"/> Red or brown color urine<br>10 <input type="checkbox"/> Hide damage<br>11 <input type="checkbox"/> Loss of production<br>12 <input type="checkbox"/> Don't know |
| 2.1.13 | Animals can get diseases from ticks?                                                                                   | 1 <input type="checkbox"/> No<br>2 <input type="checkbox"/> Yes<br>3 <input type="checkbox"/> Don't know                                                                                                                                                                                                                                                                                                                                                                                                                              |
| 2.1.14 | Do you know about any tick-borne disease of animals?                                                                   | 1 <input type="checkbox"/> Yes<br>2 <input type="checkbox"/> No                                                                                                                                                                                                                                                                                                                                                                                                                                                                       |

## Section 2.2: Human being and ticks (A zoonotic perspective)

|       |                                                                                                                      |                                                                                                                                                                                                            |
|-------|----------------------------------------------------------------------------------------------------------------------|------------------------------------------------------------------------------------------------------------------------------------------------------------------------------------------------------------|
| 2.2.1 | Did you experience tick bite ever?                                                                                   | 1 <input type="checkbox"/> No<br>2 <input type="checkbox"/> Yes                                                                                                                                            |
| 2.2.2 | Which symptoms do you think any person can feel after tick bite?<br><i>If you think choose more than one option.</i> | 1 <input type="checkbox"/> Fever and headache<br>2 <input type="checkbox"/> Irritation with pain<br>3 <input type="checkbox"/> Swelling around the bite and rash<br>4 <input type="checkbox"/> No symptoms |
| 2.2.3 | In your opinion ticks can transmit disease in human beings?                                                          | 1 <input type="checkbox"/> No<br>2 <input type="checkbox"/> Yes<br>3 <input type="checkbox"/> Don't know                                                                                                   |

## Section 3: Respondents attitudes towards tick control

| Attitude Questions on Likert scale                                                                                                                                                  | 1     | 2              | 3        | 4                 | 5          |
|-------------------------------------------------------------------------------------------------------------------------------------------------------------------------------------|-------|----------------|----------|-------------------|------------|
| 3.1 Tick infestations in animals can be reduced by using synthetic acaricides appropriately.                                                                                        | Agree | Strongly agree | Disagree | Strongly disagree | No opinion |
| 3.2 The risk of tick infestation can be avoided by keeping the animals in the shed at all times.                                                                                    | Agree | Strongly agree | Disagree | Strongly disagree | No opinion |
| 3.3 Adopting excellent farm practices (e.g., regular floor washing, regular animal checks, avoiding the use of bedding materials, etc.) helps lower the danger of tick infestation. | Agree | Strongly agree | Disagree | Strongly disagree | No opinion |

#### Section 4: Practices of respondents in livestock farms

|     |                                                                   |                                                                                                                                                                                                                                                                                                                               |
|-----|-------------------------------------------------------------------|-------------------------------------------------------------------------------------------------------------------------------------------------------------------------------------------------------------------------------------------------------------------------------------------------------------------------------|
| 4.1 | What is the primary reason for raising animal in your household)? | 1 <input type="checkbox"/> Breeding purpose<br>2 <input type="checkbox"/> Sale of animal products<br>3 <input type="checkbox"/> Sale of animals to get income<br>4 <input type="checkbox"/> Family consumption of products<br>5 <input type="checkbox"/> As a source of manure<br>6 <input type="checkbox"/> Breeding purpose |
| 4.2 | Animal shed type?                                                 | 1 <input type="checkbox"/> Open tethering<br>2 <input type="checkbox"/> CGI Sheet and wooden floors.<br>3 <input type="checkbox"/> Traditional Shed<br>4 <input type="checkbox"/> CGI Sheet and concrete floors.                                                                                                              |
|     |                                                                   |                                                                                                                                                                                                                                                                                                                               |

|     |                                                                                                                                |                                                                                                                                                                                                                                                                                                                               |
|-----|--------------------------------------------------------------------------------------------------------------------------------|-------------------------------------------------------------------------------------------------------------------------------------------------------------------------------------------------------------------------------------------------------------------------------------------------------------------------------|
| 4.3 | Frequency of washing of your concrete livestock farm?                                                                          | 1 <input type="checkbox"/> Monthly<br>2 <input type="checkbox"/> Daily<br>3 <input type="checkbox"/> Weekly<br>4 <input type="checkbox"/> Fortnightly<br>5 <input type="checkbox"/> Not once                                                                                                                                  |
| 4.4 | In your shed do you use bedding material?                                                                                      | 1 <input type="checkbox"/> No<br>2 <input type="checkbox"/> Yes                                                                                                                                                                                                                                                               |
| 4.5 | If you use bedding material which type you use?                                                                                | 1 <input type="checkbox"/> Paddy straw<br>2 <input type="checkbox"/> Maize stover<br>3 <input type="checkbox"/> Litter leaves<br>4 <input type="checkbox"/> Bracken fern                                                                                                                                                      |
| 4.6 | In which season do you use bedding material?                                                                                   | 1 <input type="checkbox"/> Winter<br>2 <input type="checkbox"/> Summer<br>3 <input type="checkbox"/> Throughout the year                                                                                                                                                                                                      |
| 4.7 | In your opinion which diseases are mostly prevalent in livestock?<br><i>Select 3 of the problems</i>                           | 1 <input type="checkbox"/> Endo parasitism<br>2 <input type="checkbox"/> Milk fever<br>3 <input type="checkbox"/> Mastitis<br>4 <input type="checkbox"/> Foot and mouth disease<br>5 <input type="checkbox"/> Plant poisoning<br>6 <input type="checkbox"/> Bacterial diseases<br>7 <input type="checkbox"/> Tick infestation |
| 4.8 | Why you visit to veterinary centers and for what purpose you visit to centers?                                                 | 1 <input type="checkbox"/> Livestock products input<br>2 <input type="checkbox"/> Medication for sick animal<br>3 <input type="checkbox"/> Deworming agents<br>4 <input type="checkbox"/> Reciving of acaricides<br>5 <input type="checkbox"/> Better farming practice advices.                                               |
| 4.9 | In case of tick infestation on your farm how you get rid on this problem?<br><i>Respondents can have more than one answer.</i> | 1 <input type="checkbox"/> Acaricidal usage<br>2 <input type="checkbox"/> Monitor animal and restrict them to outside grazing<br>3 <input type="checkbox"/> Rotational grazing<br>4 <input type="checkbox"/> Use homemade remedies<br>5 <input type="checkbox"/> Manually remove the ticks.                                   |
|     |                                                                                                                                |                                                                                                                                                                                                                                                                                                                               |

|      |                                                                                                                                                   |                                                                                                                                                                                                                                                                                                                                           |
|------|---------------------------------------------------------------------------------------------------------------------------------------------------|-------------------------------------------------------------------------------------------------------------------------------------------------------------------------------------------------------------------------------------------------------------------------------------------------------------------------------------------|
| 4.10 | In what frequency do you use acaricides?                                                                                                          | 1 <input type="checkbox"/> Every week<br>2 <input type="checkbox"/> After 15 days<br>3 <input type="checkbox"/> In a month<br>4 <input type="checkbox"/> Some times                                                                                                                                                                       |
| 4.11 | What is the effective method for acaricidal use?                                                                                                  | 1 <input type="checkbox"/> Spraying with hands<br>2 <input type="checkbox"/> Dressing with hands<br>3 <input type="checkbox"/> Pour on<br>4 <input type="checkbox"/> Mixture of all mentioned practices                                                                                                                                   |
| 4.12 | After acaricidal treatment how long does it takes for ticks to fall off?                                                                          | 1 <input type="checkbox"/> Within a few hours<br>2 <input type="checkbox"/> Within a day<br>3 <input type="checkbox"/> Within a few days<br>4 <input type="checkbox"/> Within a week.                                                                                                                                                     |
| 4.13 | When ticks fall from animal body after administering acaricides or manually removing or brushing the infested animals. What do you do with ticks? | 1 <input type="checkbox"/> Let it stay on the ground<br>2 <input type="checkbox"/> Collect and throw it in the field<br>3 <input type="checkbox"/> Collect and burn<br>4 <input type="checkbox"/> Leave them in running water                                                                                                             |
| 4.14 | When you visit the forest do you check your body after come back?                                                                                 | 1 <input type="checkbox"/> Always<br>2 <input type="checkbox"/> Sometimes<br>3 <input type="checkbox"/> Never                                                                                                                                                                                                                             |
| 4.15 | After handling tick infested animals do you check your body?                                                                                      | 1 <input type="checkbox"/> Never<br>2 <input type="checkbox"/> Always<br>3 <input type="checkbox"/> Sometimes                                                                                                                                                                                                                             |
| 4.16 | In case of un-availability of acaricides, which method do you used for tick control?                                                              | 1 <input type="checkbox"/> Brush the animal<br>2 <input type="checkbox"/> Manually remove<br>3 <input type="checkbox"/> With help of kerosene and petroleum products<br>4 <input type="checkbox"/> Apply <i>Zanthoxylum</i> mixture solution<br>5 <input type="checkbox"/> With solution of salt<br>6 <input type="checkbox"/> Do nothing |
|      |                                                                                                                                                   |                                                                                                                                                                                                                                                                                                                                           |

|      |                                                                                        |   |                          |                                        |
|------|----------------------------------------------------------------------------------------|---|--------------------------|----------------------------------------|
| 4.17 | Where else do you think acaricides can be utilized besides treating tick infestations? | 1 | <input type="checkbox"/> | To get rid on mites, lice and bugs etc |
|      |                                                                                        | 2 | <input type="checkbox"/> | As pesticides on vegetable fields      |
|      |                                                                                        | 3 | <input type="checkbox"/> | No idea                                |
